# Supplementary material
Source: PubMed Central journal article supplement (PMC4970932)
Supplement: NIHMS775861-supplement-01.pdf [file NIHMS775861-supplement-01.pdf]

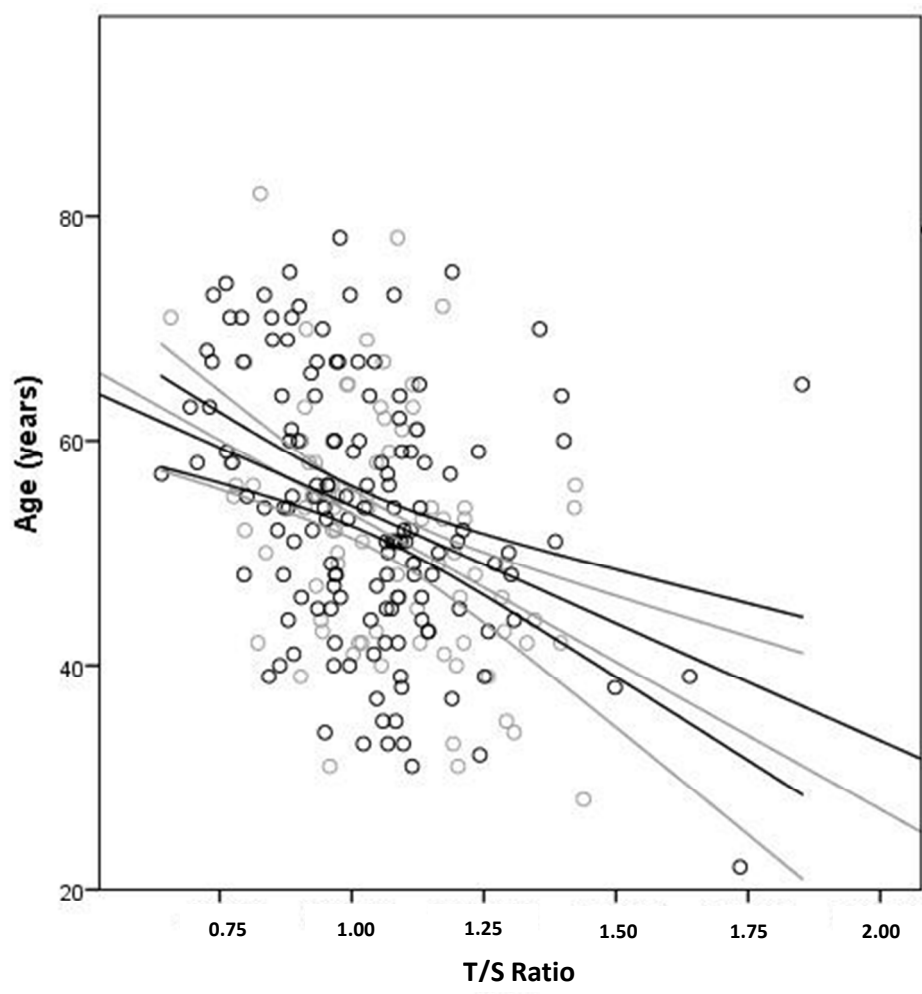

Supplemental Figure. Relationship between age and telomere length in patients with RA and control subjects. Data from patients with RA are presented in black (circles for individual data points, and line for linear regression and 95% confidence intervals) and data from control subjects are presented in grey.

Supplemental Table. Relationship between current medication use and telomere length in patients with RA

|                    | $\beta$ coefficient (95% CI) | Adjusted P value* |
|--------------------|------------------------------|-------------------|
| Methotrexate       | 0.01 (-0.07, 0.07)           | 0.90              |
| Leflunomide        | 0.01(-0.07, 0.08)            | 0.82              |
| Hydroxychloroquine | 0.01 (-0.06, 0.08)           | 0.76              |
| Anti-TNF agent     | -0.03 (-0.10, 0.04)          | 0.38              |
| Corticosteroids    | 0.01 (-0.05, 0.07)           | 0.82              |
| NSAIDs             | -0.04 (-0.03, 0.11)          | 0.26              |

\*Adjusted for age, race and sex. TNF= tumor necrosis factor alpha. NSAIDs= non-steroidal anti-inflammatory drugs.
